## ERRATA

MEAD, A. R. AND VAUGHAN, J. A. (1969)

### **Some requirements for mating in the rabbit flea, *Spilopsyllus cuniculi* (Dale)**

*J. Exp. Biol.* 51, 495-511.

Page 507. Table 7. Each entry for mean length and mean width of the lateral accessory glands should be 3.75 times greater than indicated.

MOTAIS, R., ISALA, J., RANKIN, J. C. AND MAETZ J. (1969)

### **Adaptive changes of the water permeability of the teleostean gill epithelium in relation to external salinity**

*J. Exp. Biol.* 51, 529-546.

Page 534. Table 2:

|             |             |   |                  |
|-------------|-------------|---|------------------|
| <i>For</i>  | SW Anguilla | 8 | $9.3 \pm 2.4^*$  |
| <i>Read</i> | SW Anguilla | 8 | $29.3 \pm 2.4^*$ |
